# Supplementary material for: A TNF-Regulated Recombinatorial Macrophage Immune Receptor Implicated in Granuloma Formation in Tuberculosis
Source: PLOS journal article supplement (doi:10.1371/journal.ppat.1002375), 2011-11-17
Supplement: S9 (10.1371/journal.ppat.1002375.s009) [file journal.ppat.1002375.s009]

**Table S2**

|    | <b>Organized Granuloma</b> | <b>Granuloma Structure</b>                                                                                                                                                  | <b>CCL2</b> | <b>CD68<sup>+</sup>/ TCRαβ<sup>+</sup> Macrophages</b> | <b>Location of CD68<sup>+</sup>/ TCRαβ<sup>+</sup> cells</b>                                      | <b>Sex &amp; Age</b> |
|----|----------------------------|-----------------------------------------------------------------------------------------------------------------------------------------------------------------------------|-------------|--------------------------------------------------------|---------------------------------------------------------------------------------------------------|----------------------|
| 1  | Y                          | Organized. Well-circumscribed with caseous necrosis in centre.                                                                                                              | -           | +                                                      | Surrounding caseous necrosis.                                                                     | Male 59              |
| 2  | Y                          | Organized. Well-circumscribed with caseous necrosis in centre.                                                                                                              | +           | +                                                      | Surrounding caseous necrosis.                                                                     | Male 47              |
| 3  | Y                          | Organized. Well-circumscribed with caseous necrosis in centre.                                                                                                              | -           | +                                                      | Surrounding caseous necrosis.                                                                     | Female 68            |
| 4  | Y                          | Early forming granuloma.                                                                                                                                                    | +           | +                                                      | Positive cells are infiltrating the tissue and within the centre of an early granuloma structure. | Male 43              |
| 5  | N                          | Several areas of necrosis are evident although the granuloma structure has not formed. Large cellular infiltration.                                                         | -           | +                                                      | Positive cells within clusters of macrophages and T cells.                                        | Male 43              |
| 6  | Y                          | Organized. Well circumscribed with caseous necrosis in centre.                                                                                                              | +           | +                                                      | Surrounding caseous necrosis.                                                                     | Male 65              |
| 7  | Y                          | Large necrotic area and cell infiltration.                                                                                                                                  | -           | +                                                      | Within the necrotic tissue there are some CD68 <sup>+</sup> / TCRαβ <sup>+</sup> cells.           | Female 67            |
| 8  | Y                          | Organized. Well circumscribed with caseous necrosis in centre.                                                                                                              | +           | +                                                      | Surrounding caseous necrosis                                                                      | Male 49              |
| 9  | Y                          | Organized. Well circumscribed with caseous necrosis in centre.                                                                                                              | -           | +                                                      | Very few CD68 <sup>+</sup> / TCRαβ <sup>+</sup> cells are present. T cells dominant.              | Male 40              |
| 10 | N                          | Granuloma is not well circumscribed with several necrotic foci containing CD68 <sup>+</sup> cells within the tissue and massive infiltration of TCRαβ <sup>+</sup> T cells. | -           | -                                                      |                                                                                                   | Female 73            |
| 11 | N                          | T cell infiltration.                                                                                                                                                        | -           | +                                                      | Very few CD68 <sup>+</sup> / TCRαβ <sup>+</sup> cells are present. T cells dominant.              | Male 56              |
| 12 | N                          | Multiple large necrotic sites, not well circumscribed.                                                                                                                      | -           | -                                                      |                                                                                                   | Female 16            |
| 13 | N                          | Large cellular infiltration of CD68 <sup>+</sup> cells and TCRαβ <sup>+</sup> T cells. Disorganized necrosis.                                                               | -           | -                                                      |                                                                                                   | Female 58            |
